# Supplementary material
Source: Springer Nature journal article supplement (https://www.springermedizin.de/resource/supplementary/12885_2010_2744_MOESM2_ESM.pdf/9461858)

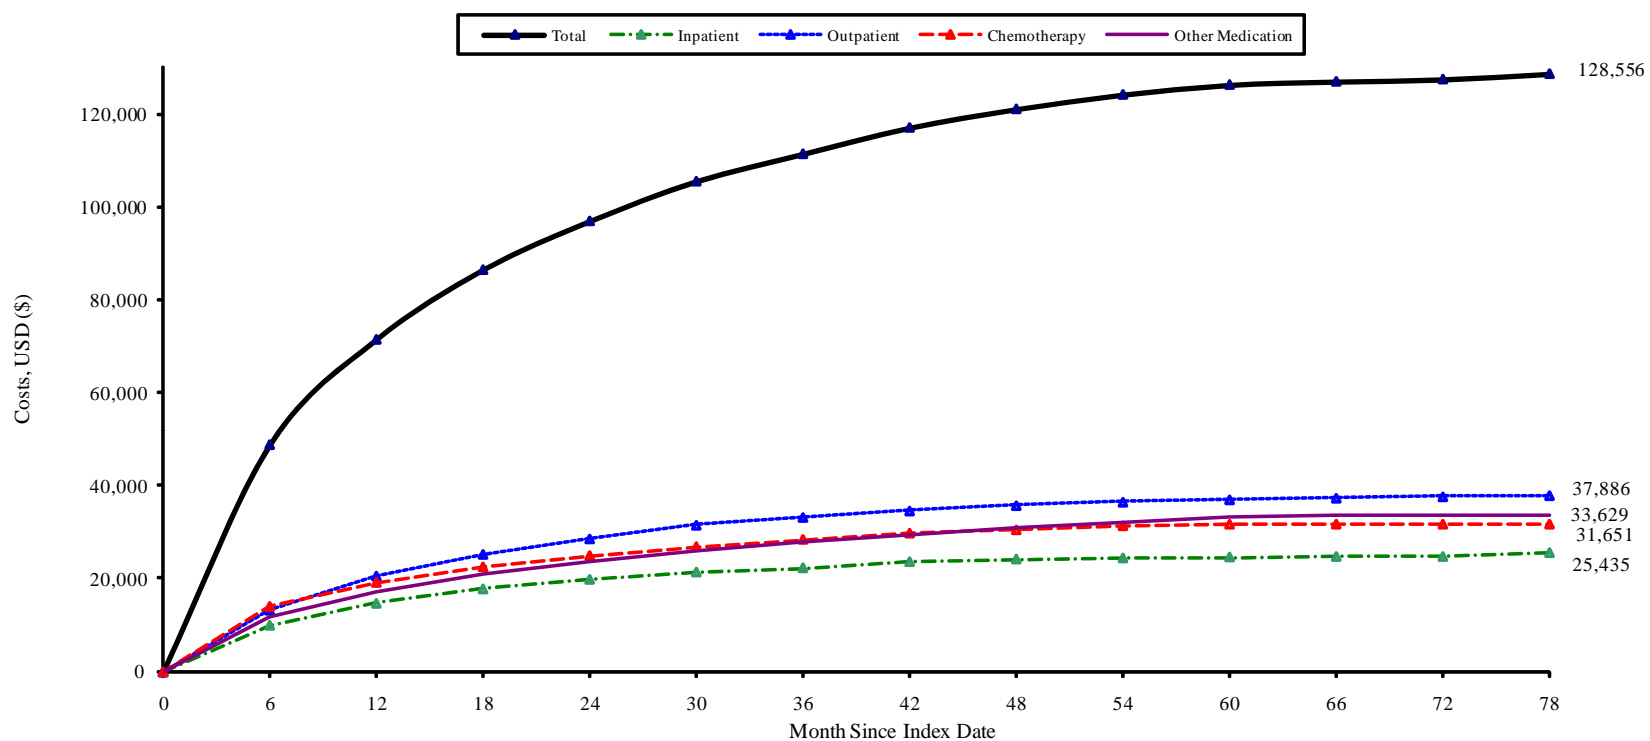

Number of patients

1444 1009 689 490 349 247 181 135 93 63 39 19 9 1

Follow-up, mean (SD)= 532 (495) days

Supplement: MOESM2 [file 9461858]
